# Supplementary material for: Mesenchymal Stem Cells Preserve Working Memory in the 3xTg-AD Mouse Model of Alzheimer’s Disease
Source: PubMed Central journal article supplement (PMC4783886; doi:10.3390/ijms17020152), 2016-01-25
Supplement: ijms-17-00152-s001.pdf [file ijms-17-00152-s001.pdf]

## Supplementary Materials: Mesenchymal Stem Cells Attenuate Working Memory in the 3xTg-AD Mouse Model of Alzheimer's Disease

Jiri Ruzicka, Magdalena Kulijewicz-Nawrott, Jose Julio Rodriguez-Arellano, Pavla Jendelova and Eva Sykova

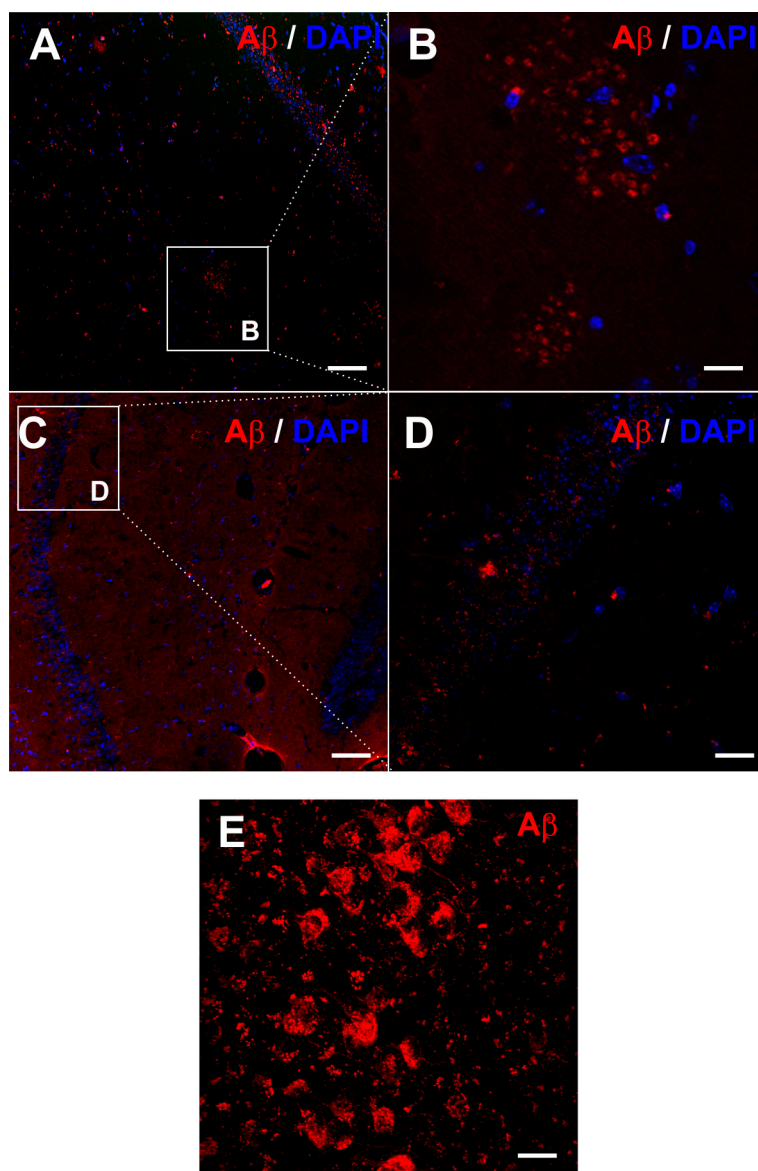

**Figure S1.** A $\beta$  intracellular deposits and plaque formation (red) at 14 months of age in the hippocampus of saline- (A, detail B) and hMSC-treated AD mice (C, detail D). A $\beta$  intracellular deposits and plaque formation (red) at 20 months of age in the hippocampus of a 3xTg AD mouse (E). Scale bars: 20  $\mu$ m (A,C) and 60  $\mu$ m (B,D,E). DAPI: 4',6-Diamidino-2'-phenylindole dihydrochloride, blue.
